# Which agents cause reactive airways dysfunction syndrome (RADS)? A systematic review

M. S. Shakeri<sup>1</sup>, F. D. Dick<sup>2</sup> and J. G. Ayres<sup>2</sup>

|                    |                                                                                                                                                                                                                                                                                                                                                                                                                                                                                                                 |
|--------------------|-----------------------------------------------------------------------------------------------------------------------------------------------------------------------------------------------------------------------------------------------------------------------------------------------------------------------------------------------------------------------------------------------------------------------------------------------------------------------------------------------------------------|
| <b>Aim</b>         | To identify those agents reported as being associated with reactive airways dysfunction syndrome (RADS).                                                                                                                                                                                                                                                                                                                                                                                                        |
| <b>Methods</b>     | A systematic review was undertaken. Abstracts were screened and those selected reviewed against pre-determined diagnostic criteria for RADS.                                                                                                                                                                                                                                                                                                                                                                    |
| <b>Results</b>     | Significant information gaps were identified for all measures of interest. In some articles, even the causative agent was not reported. The most commonly reported agents were chlorine (nine subjects), toluene di-isocyanate (TDI) ( $n = 6$ ) and oxides of nitrogen ( $n = 5$ ). Most exposures occurred in the workplace ( $n = 51$ ) and affected men (60%). Dyspnoea (71%) and cough (65%) were the commonest symptoms. Median symptom duration was 13 months (interquartile range = 6.5–43.5) for RADS. |
| <b>Conclusions</b> | Although the most commonly reported agent associated with RADS was chlorine, the main finding of a general lack of adequate information on exposure, investigation and outcome suggests that to better explore RADS a more structured approach to gathering information is required. A minimum data set for reporting RADS cases is proposed.                                                                                                                                                                   |
| <b>Key words</b>   | Asthma; irritant-induced asthma; reactive airways dysfunction.                                                                                                                                                                                                                                                                                                                                                                                                                                                  |

## Background

Twenty years ago, Brooks coined the term 'reactive airway dysfunction syndrome' (RADS) [1] which he defined as symptoms simulating asthma within 24 h of a single, massive, chemical exposure. The United Kingdom surveillance of work-related and occupational respiratory disease (SWORD) survey found that the prevalence of asthma in those who had had an acute irritant exposure varied, apparently affected by the intensity and length of acute exposure, the duration of follow-up and the suspected agent [2]. As the agent involved in RADS may affect prognosis, the authors aimed to assess the range of agents implicated in RADS.

## Methods

A systematic review of RADS using Brooks' criteria (see Figure 1) was undertaken. Studies were included if

subjects suffered from RADS as defined by Brooks. Reactive airways dysfunction was defined (see Figure 1) as requiring a documented absence of preceding respiratory complaint with symptom onset occurring after a single specific exposure incident to a gas, smoke, fume or vapour present in very high concentrations which had irritant qualities to its nature. Further, Brooks required that the onset of symptoms occurred within 24 h after the exposure and persisted for at least 3 months, that symptoms simulated asthma (cough, wheezing, chest tightness and dyspnoea) and that while pulmonary function tests might show airflow obstruction, methacholine challenge testing was positive and other types of pulmonary disease were ruled out. Studies were excluded if they contained no cases meeting Brooks' RADS criteria or were duplicate publications or follow-up studies.

Studies were identified by searching MEDLINE, EMBASE and CINAHL from 1985 to 2005 (limited to English language and further limited to human research for EMBASE and MEDLINE) supplemented by review of references of recent review articles and original reports. The search was complemented by hand-searching conference abstracts published in the American Review of Respiratory and Critical Care Medicine, European Respiratory Journal and Thorax from 1985 onwards. Key-word search terms included reactive airways dysfunction

<sup>1</sup>Department of Occupational Health, Province Health Centre, Mazandaran University of Medical Science, Sari, Iran.

<sup>2</sup>Department of Environmental & Occupational Medicine, Institute of Applied Health Sciences, School of Medicine, University of Aberdeen, Aberdeen, UK.

Correspondence to: Jon Ayres, Department of Environmental & Occupational Medicine, Liberty Safe Work Research Centre, Institute of Applied Health Sciences, School of Medicine, University of Aberdeen, Foresterhill Road, Aberdeen AB25 2ZP, UK. Tel: +44 1224 558188; fax: +44 1224 551826; e-mail: j.g.ayres@abdn.ac.uk

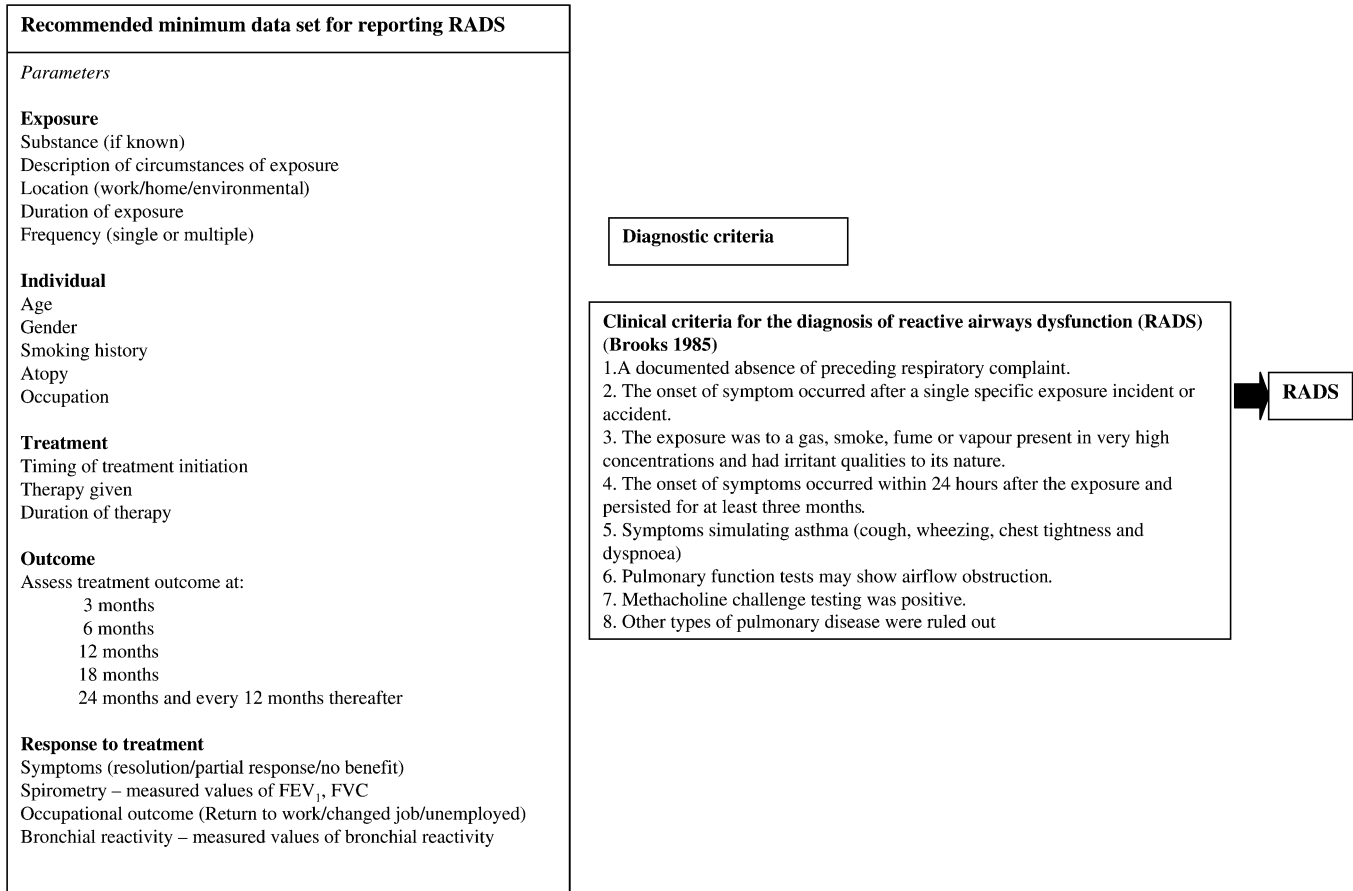

**Figure 1.** Flow chart showing on the left the suggested minimum data set for reporting any case of reactive airways dysfunction and on the right Brook's diagnostic criteria referred to in this review.

syndrome, irritant-induced asthma, toxic gas inhalation, non-immunologic asthma or irritant gas.

Two people (M.S.S. and F.D.D.) reviewed all titles and abstracts to exclude studies that failed to meet inclusion criteria. Full texts selected were reviewed to exclude studies where the patient did not have RADS. Disagreements on three cases were resolved by discussion. A single reviewer (M.S.S.) extracted data on the causative agent or agents, exposure level, duration of overexposure, location of accident, number of cases, symptom onset, symptoms, symptom duration, the provocation concentration causing a 20% fall (PC<sub>20</sub>) in forced expiratory volume in 1 s after inhalation of methacholine or histamine, forced expiratory volume in 1 s (FEV<sub>1</sub>%), FEV<sub>1</sub>/forced vital capacity ratio (FVC), variation of peak expiratory flow, treatment onset, treatment type, treatment response, atopy and, where undertaken, biopsy results. After data extraction, results were entered on separate tables for each category of data (e.g. PC<sub>20</sub>, FEV<sub>1</sub>%) extracted.

**Results**

Eighty-four articles and abstracts were found but 25 of the articles identified either contained no cases meeting

RADS criteria or were duplicate publications or follow-up studies and so were excluded. Among the 633 cases described in the 59 articles selected, 63 cases met Brooks' criteria and 570 had insufficient data for allocation to RADS (Appendix 1). Of the 63 RADS cases, 38 (60%) were male, 12 (19%) female and in 13 (21%) gender was not reported. The mean age in this group was 37.8 (SD 11.6) years but age was not reported for seven people.

The most common agents in patients who met Brooks' criteria were chlorine (nine subjects), TDI (six subjects), oxides of nitrogen (five subjects), acetic acid (four subjects), sulphur dioxide (four subjects) and paint (four subjects) [1].

The most frequent location of exposure episode in those with RADS (*n* = 63) was the workplace (*n* = 51) with others occurring in the environment (eight subjects), home (three subjects) and not reported (one subject). The proportion of non-atopic patients was higher than atopic patients but for 41% of RADS group atopic status was not reported.

The onset of symptoms in Brooks' group occurred immediately (within 1 h) in 29 patients and within 24 h in 34 patients. In one article that reported 20 cases [3], the onset of symptoms in 17 cases occurred within 24 h

and in three cases within 1 week. It is unclear in which of those cases symptoms began within 1 week. As it was not possible to categorize these 20 patients, they were excluded.

Dyspnoea, cough and wheeze were the most common symptoms. Seventy-one per cent of RADS subjects had dyspnoea ( $n = 45$ ), 65% cough ( $n = 41$ ), 43% wheeze ( $n = 31$ ), 43% chest tightness ( $n = 27$ ), 29% upper respiratory irritation ( $n = 18$ ), 25% eye irritation ( $n = 16$ ), 16% mucus production ( $n = 10$ ) and 6% cyanosis ( $n = 4$ ). In the RADS group, symptom duration was recorded in all cases. The median and interquartile range (IQR) for symptom duration in patients who met Brooks' criteria was 13 (6.5–43.5) months.

Of 63 patients who met Brooks' criteria, 19 (30%) were smokers with a median (IQR) consumption of 11 (7–18) pack-years, 7 patients (11%) were ex-smokers with a median (IQR) consumption 5 (5–10.8) pack-years and 21 (33%) patients were non-smokers. In 16 subjects with RADS (25%), no information was given about smoking.

Information regarding FEV<sub>1</sub>% was available for 49 of the 63 (78%) subjects with RADS. Among these 49 subjects, 16 subjects (33%) had an FEV<sub>1</sub>% <80%, the median (IQR) for FEV<sub>1</sub>% being 63% (55.5–75). FEV<sub>1</sub>/FVC ratios were available for 44 of the 63 patients (70%) meeting Brooks' criteria and in 23 of these 44 cases (52%), the ratio was <80%. The median FEV<sub>1</sub>/FVC ratio was 69% (64.3–71.8).

## Discussion

The most commonly reported agents in the literature associated with a diagnosis of RADS were chlorine, TDI and oxides of nitrogen. The agents most frequently implicated in RADS were as anticipated although this list is likely to be incomplete as many cases of RADS may go unreported. It is possible that a degree of publication bias exists as once an agent has been first reported thereafter single case studies are less likely to be published and so the relative contribution of some agents to the overall burden of RADS may be underestimated. As these reports are essentially descriptive papers such suspected publication bias cannot be formally tested. However, the main finding was the remarkable inconsistency in the information provided, which in many cases did not permit a diagnosis of RADS despite being reported as such. In >40% of all cases, data were missing. In five articles, the causative agents were not stated.

Information on outcomes in relation to exposures needs to be collected formally and in a structured way if better advice and understanding of these conditions is to be gained. It is proposed that the data listed in Figure 1 constitute a minimum data set for reporting of RADS cases in the medical literature. A web-based reporting

system with a database that could be updated online to permit the reporting and follow-up of cases would be of benefit and would deal to some extent with the issue of publication bias.

In summary, a systematic review of agents reported as being associated with RADS has been undertaken. The key finding is a lack of complete reporting of relevant information which limits generalization from, or summary of, these reports. As a consequence, a minimum data set for reporting RADS in the literature is proposed.

## Key points

- There was a general lack of adequate information on exposure, investigation and, in particular, outcome of reported cases or case series of RADS.
- The most commonly reported agent associated with RADS was chlorine with TDI and oxides of nitrogen next most common.
- We suggest that a web-based database of RADS (and irritant-induced asthma) cases be established which would allow continuous update and better analysis of outcome in these individuals.

## Conflicts of interest

None declared.

## References

1. Brooks SM, Weiss MA, Bernstein IL. Reactive airways dysfunction syndrome (RADS). Persistent asthma syndrome after high-level irritant exposures. *Chest* 1985;**88**:376–384.
2. Banks DE. Workplace irritant exposures: do they produce true occupational asthma? *Curr Opin Allergy Clin Immunol* 2001;**1**:163–168.
3. Cone JE, Wugofski L, Balmes JR *et al.* Persistent respiratory health effects after a metam sodium pesticide spill. *Chest* 1994;**106**:500–508.
4. Reilly MJ, Rosenman KD. Use of hospital discharge data for surveillance of chemical-induced respiratory disease. *Arch Environ Health* 1995;**50**:26–30.
5. Tarlo SM, Broder I. Irritant-induced occupational asthma. *Chest* 1989;**96**:297–300.
6. Chatkin JM, Tarlo SM, Liss G, Banks D, Broder I. Occupational and environmental lung disease. The outcome of asthma related to workplace irritant exposures: a comparison of irritant-induced asthma and irritant aggravation of asthma. *Chest* 1999;**116**:1780–1785.
7. Tarlo SM. Workplace irritant exposures: do they produce true occupational asthma? *Ann Allergy Asthma Immunol* 2003;**90**(Suppl. 2):19–23.
8. Brooks SM, Hammad Y, Richards I, Giovenco-Barbas J, Jenkins K. The spectrum of irritant-induced asthma: sudden

- and not-so-sudden onset and the role of allergy. *Chest* 1998; **113**:42–49.
9. Medina-Ramon M, Zock JP, Kogevinas M *et al.* Asthma, chronic bronchitis, and exposure to irritant agents in occupational domestic cleaning: a nested case-control study. *Occup Environ Med* 2005; **62**:586–587.
  10. Malo JL, Cartier A, Boulet LP *et al.* Bronchial hyperresponsiveness can improve while spirometry plateaus two or three years after repeated exposure to chlorine causing respiratory symptoms. *Am J Respir Crit Care Med* 1994; **150**:1142–1145.
  11. Matrat M, Laurence MF, Iwatsubo Y *et al.* Reactive airways dysfunction syndrome caused by bromochlorodifluoromethane from fire extinguishers. *Occup Environ Med* 2004; **61**:712–714.
  12. Luo JC, Nelsen KG, Fischbein A. Persistent reactive airway dysfunction syndrome after exposure to toluene diisocyanate. *Br J Ind Med* 1990; **47**:239–241.
  13. de la Hoz RE. Reactive airways dysfunction syndrome following exposure to a fluorocarbon. *Eur Respir J* 1999; **13**:1192–1194.
  14. Franzblau A, Sahakian N. Asthma following household exposure to hydrofluoric acid. *Am J Ind Med* 2003; **44**:321–324.
  15. Piirila PL, Nordman H, Korhonen OS, Winblad I. A thirteen-year follow-up of respiratory effects of acute exposure to sulfur dioxide. *Scand J Work Environ Health* 1996; **22**:191–196.
  16. Forrester BG. Reactive airways dysfunction syndrome: occurrence after exposure to a refractory ceramic fiber-phosphoric acid binder mixture. *South Med J* 1997; **90**:447–450.
  17. Angelillo VA. Reactive airway dysfunction syndrome (RADS): a report of three cases. *Respir Care* 1992; **37**:254–257.
  18. Weiss JS. Reactive airway dysfunction syndrome due to sodium azide inhalation. *Int Arch Occup Environ Health* 1996; **68**:469–471.
  19. Schonhofer B, Voshaar T, Kohler D. Long-term lung sequelae following accidental chlorine gas exposure. *Respiration* 1996; **63**:155–159.
  20. Promisloff RA, Phan A, Lenchner GS, Cichelli AV. Reactive airway dysfunction syndrome in three police officers following a roadside chemical spill. *Chest* 1990; **98**:928–929.
  21. Boulet LP. Increases in airway responsiveness following acute exposure to respiratory irritants. Reactive airway dysfunction syndrome or occupational asthma? *Chest* 1988; **94**:476–481.
  22. Piirila P, Espo T, Paffli P, Riihimäki V, Wolff H, Nordman H. Prolonged respiratory symptoms caused by thermal degradation products of freons. *Scand J Work Environ Health* 2003; **29**:71–77.
  23. Demeter SL, Cordasco EM, Guidotti TL. Permanent respiratory impairment and upper airway symptoms despite clinical improvement in patients with reactive airways dysfunction syndrome. *Sci Total Environ* 2001; **270**:49–55.
  24. Karjalainen A, Martikainen R, Karjalainen J, Klaukka T, Kurppa K. Excess incidence of asthma among Finnish cleaners employed in different industries. *Eur Respir J* 2002; **19**:90–95.
  25. Medina-Ramon M, Zock JP, Kogevinas M, Sunyer J, Anto JM. Asthma symptoms in women employed in domestic cleaning: a community based study. *Thorax* 2003; **58**:950–954.
  26. Sherriff A, Farrow A, Golding J, Henderson J. Frequent use of chemical household products is associated with persistent wheezing in pre-school age children. *Thorax* 2005; **60**:45–49.
  27. Alberts WM, Do Pico GA. Reactive airways dysfunction syndrome. *Chest* 1996; **109**:1618–1626.
  28. Gilbert R, Auchincloss JH Jr. Reactive airways dysfunction syndrome presenting as a reversible restrictive defect. *Lung* 1989; **167**:55–61.
  29. Demeter SL, Cordasco EM. Reactive airways dysfunction syndrome: a subset of occupational asthma. *J Disability* 1990; **1**:23–39.
  30. George PJM, Fogarty PW, Solomon M, Spiro SG, Armstrong RF. Long term effects of smoke inhalation in survivors of an underground station fire. *Am Rev Respir Dis* 1990; **141**(Suppl.):A424.
  31. Saric M, Marelja J. Bronchial hyperreactivity in potroom workers and prognosis after stopping exposure. *Br J Ind Med* 1991; **48**:653–655.
  32. Kern DG. Outbreak of the reactive airways dysfunction syndrome after a spill of glacial acetic acid. *Am Rev Respir Dis* 1991; **144**:1058–1064.
  33. Hu H, Christiani D. Reactive airways dysfunction after exposure to tear gas. *Lancet* 1992; **339**:1535.
  34. Blanc PD, Galbo M, Hiatt P, Olson KR, Balmes JR. Symptoms, lung function, and airway responsiveness following irritant inhalation. *Chest* 1993; **103**:1699–1705.
  35. Palczynski C, Gorski P, Jakubowski J. The case of TDI-induced reactive airway dysfunction syndrome with the presence of specific IgE antibodies. *Allergol Immunopathol (Madr)* 1994; **22**:80–82.
  36. Chan-Yeung M, Lam S, Kennedy SM, Frew AJ. Persistent asthma after repeated exposure to high concentrations of gases in pulp mills. *Am J Respir Crit Care Med* 1994; **149**:1676–1680.
  37. Gautrin D, Boulet LP, Boutet M *et al.* Is reactive airways dysfunction syndrome a variant of occupational asthma? *J Allergy Clin Immunol* 1994; **93**:12–22.
  38. Palczynski C, Jakubowski J, Gorski P. Reactive airways dysfunction syndrome. *Int J Occup Med Environ Health* 1994; **7**:113–117.
  39. Deschamps D, Soler P, Rosenberg N, Baud F, Gervais P. Persistent asthma after inhalation of a mixture of sodium hypochlorite and hydrochloric acid. *Chest* 1994; **105**:1895–1896.
  40. Tarlo SM, Banks D, Liss G, Broder I. Asthma related to spills and accidental related exposures in a compensation population. *Am J Respir Crit Care Med* 1995; **151**(pt 2 Suppl.):A420.
  41. Sallie B, McDonald C. Inhalation accidents reported to the SWORD surveillance project 1990–1993. *Ann Occup Hyg* 1996; **40**:211–221.
  42. Stanbury M, Gatti E, Sokolowski JW. Reactive airways dysfunction syndrome in a nurse exposed to pentamidine. *J Occup Environ Med* 1996; **38**:330–331.
  43. Cormier Y, Coll B, Laviolette M, Boulet LP. Reactive airways dysfunction syndrome (RADS) following exposure to

- toxic gases of a swine confinement building. *Eur Respir J* 1996;**9**:1090–1091.
44. Lemiere C, Malo JL, Boulet LP, Boutet M. Reactive airways dysfunction syndrome induced by exposure to a mixture containing isocyanate: functional and histopathologic behaviour. *Allergy* 1996;**51**:262–265.
  45. Yelon JA, Simpson LR, Gudjonsson O. Formic acid inhalation injury: a case report. *J Burn Care Rehabil* 1996;**17**:241–242.
  46. Lemiere C, Malo JL, Boutet M. Reactive airways dysfunction syndrome due to chlorine: sequential bronchial biopsies and functional assessment. *Eur Respir J* 1997;**10**:241–244.
  47. Burns MJ, Linden CH. Another hot tub hazard: toxicity secondary to bromine and hydrobromic acid exposure. *Chest* 1997;**111**:816–819.
  48. Provencher S, Labreche FP, Guire LD. Physician based surveillance system for occupational respiratory disease: the experience of PROPULSE, Quebec, Canada. *Occup Environ Med* 1997;**54**:272–276.
  49. Danielson MS, McGavin CR, Dean P. Occupational asthma following inhalation exposure to hydrogen peroxide: first case reports. *Thorax* 1998;**53**(Suppl. 4):A67.
  50. Leroyer C, Perfetti L, Cartier A, Malo JL. Can reactive airways dysfunction syndrome (RADS) transform into occupational asthma due to “sensitisation” to isocyanates? *Thorax* 1998;**53**:152–153.
  51. Conrad E, Lo W, de Boisblanc BP, Shellito JE. Reactive airways dysfunction syndrome after exposure to dinitrogen tetroxide. *South Med J* 1998;**91**:338–341.
  52. Wheeler S, Rosenstock L, Barnhart S. A case series of 71 patients referred to a hospital-based occupational and environmental medicine clinic for occupational asthma. *West J Med* 1998;**168**:98–104.
  53. Woolf A, Shannon M. Reactive airways dysfunction and systemic complaints after mass exposure to Bromine. *Environ Health Perspect* 1999;**107**:507–509.
  54. Langley DL. Fume fever and reactive airways dysfunction syndrome in a welder. *South Med J* 1991;**84**:1034–1036.
  55. Hill AR, Silverberg NB, Mayorga D, Baldwin H. Medical hazards of the tear gas CS: a case of persistent, multisystem, hypersensitivity reaction and review of the literature. *Medicine (Baltimore)* 2000;**79**:234–240.
  56. Meyer JD, Holt DL, Chen Y, Cherry NM, McDonald JC. SWORD '99: surveillance of work-related and occupational respiratory disease in the UK. *Occup Med (Lond)* 2001;**51**:204–208.
  57. Dube D, Puruckherr M, Byrd RP Jr, Roy TM. Reactive airways dysfunction syndrome following metal fume fever. *Tenn Med* 2002;**95**:236–238.
  58. Kopferschmitt-Kubler MC, Ameille J, Popin E *et al.* Occupational asthma in France: a 1-yr report of the Observatoire National de Asthmes Professionnels project. *Eur Respir J* 2002;**19**:84–89.
  59. Perfetti L, Brame B, Ferrari M, Moscato G. Occupational asthma (OA) with sensitization to diphenylmethane diisocyanate (MDI) presenting at the onset like a reactive airways dysfunction syndrome (RADS). *Am J Ind Med* 2003;**44**:325–328.
  60. McLaughlin AM, Kone EM, Fitzgerald MX. Reactive airway dysfunction syndrome in Ireland. *Ir J Med Sci* 2003;**172**:155.
  61. Henneberger PK, Derk SJ, Davis L *et al.* Work-related reactive airways dysfunction syndrome cases from surveillance in selected US states. *J Occup Environ Med* 2003;**45**:360–368.
  62. Rosenman KD, Reilly MJ, Schill DP *et al.* Cleaning products and work-related asthma. *J Occup Environ Med* 2003;**45**:556–563.
  63. Banauch GI, Alleyne D, Sanchez R *et al.* Persistent hyper-reactivity and reactive airway dysfunction in firefighters at the World Trade Center. *Am J Respir Crit Care Med* 2003;**168**:54–62.
  64. Gorguner M, Aslan S, Inandi T, Cakir Z. Reactive airways dysfunction syndrome in housewives due to a bleach-hydrochloric acid mixture. *Inhal Toxicol* 2004;**16**: 87–91.

#### Appendix 1: Papers included in systematic review and agents implicated in RADS

| First author    | Year | RADS exposures (No.) <sup>a</sup>                                                                                                | Cases not meeting Brooks' criteria (No.) <sup>a</sup>                                                                                                           |
|-----------------|------|----------------------------------------------------------------------------------------------------------------------------------|-----------------------------------------------------------------------------------------------------------------------------------------------------------------|
| Brooks [1]      | 1985 | Uranium hexafluoride, floor sealant, spray paint (3), 35% hydrazine, heated acid, fumigating fog, metal coat remover, fire/smoke |                                                                                                                                                                 |
| Boulet [21]     | 1988 | Sulphuric acid, bleaching agent, perchloroethylene, TDI                                                                          |                                                                                                                                                                 |
| Tarlo [5]       | 1989 |                                                                                                                                  | Acids, chlorine, sulphuric acid, sulphur dioxide <sup>b</sup> , burnt paint fume, spray paint without isocyanates, chlorine, TDI, diphenyl methane diisocyanate |
| Gilbert [28]    | 1989 | Dust or mold in silo (fungus)                                                                                                    |                                                                                                                                                                 |
| Luo [12]        | 1990 |                                                                                                                                  | TDI (2)                                                                                                                                                         |
| Promisloff [20] | 1990 | Sodium hydroxide, silicon tetrachloride, trichlorosilane <sup>b</sup> (2)                                                        | Sodium hydroxide, silicon tetrachloride, trichlorosilane <sup>b</sup>                                                                                           |

**Appendix 1:** (Continued)

| First author    | Year | RADS exposures (No.) <sup>a</sup>                                      | Cases not meeting Brooks' criteria (No.) <sup>a</sup>                                                                                                                                                                                                                                                                                                                                                                                                                      |
|-----------------|------|------------------------------------------------------------------------|----------------------------------------------------------------------------------------------------------------------------------------------------------------------------------------------------------------------------------------------------------------------------------------------------------------------------------------------------------------------------------------------------------------------------------------------------------------------------|
| Demeter [29]    | 1990 | Sulphuric acid, unknown                                                | Lithium bromide, hydrogen chloride, cleaning solvent, zinc chloride (11)                                                                                                                                                                                                                                                                                                                                                                                                   |
| George [30]     | 1990 |                                                                        | Smoke (7)                                                                                                                                                                                                                                                                                                                                                                                                                                                                  |
| Saric [31]      | 1991 |                                                                        | Respiratory irritant such as hydrogen fluoride (30)                                                                                                                                                                                                                                                                                                                                                                                                                        |
| Kern [32]       | 1991 | Acetic acid (4)                                                        | Acetic acid                                                                                                                                                                                                                                                                                                                                                                                                                                                                |
| Angelillo [17]  | 1992 | Chlorine (3)                                                           |                                                                                                                                                                                                                                                                                                                                                                                                                                                                            |
| Hu [33]         | 1992 |                                                                        | <i>o</i> -chlorobenzylidene malononitrile                                                                                                                                                                                                                                                                                                                                                                                                                                  |
| Blanc [34]      | 1993 | Sodium azide (2), epoxy resin, household cleaner containing morpholine |                                                                                                                                                                                                                                                                                                                                                                                                                                                                            |
| Palczynski [35] | 1994 | TDIs                                                                   |                                                                                                                                                                                                                                                                                                                                                                                                                                                                            |
| Chan-Yeung [36] | 1994 |                                                                        | Sulphur dioxide, hydrogen sulphide, acetic acid, hydrogen peroxide, chlorine, chlorine dioxide, hydrogen sulphide, methyl mercaptan, sulphur dioxide, hydrogen peroxide <sup>b</sup> (2)                                                                                                                                                                                                                                                                                   |
| Gautrin [37]    | 1994 |                                                                        | Chlorine (12), nitrogen dioxide (3)                                                                                                                                                                                                                                                                                                                                                                                                                                        |
| Palczynski [38] | 1994 |                                                                        | Freons and phosgene <sup>b</sup>                                                                                                                                                                                                                                                                                                                                                                                                                                           |
| Deschamps [39]  | 1994 | Sodium hypochlorite and hydrochloric acid (chlorine) <sup>b</sup>      |                                                                                                                                                                                                                                                                                                                                                                                                                                                                            |
| Tarlo [40]      | 1995 |                                                                        | Isocyanates (8), acid (3), acrylate (2), solvents, fume (2)                                                                                                                                                                                                                                                                                                                                                                                                                |
| Sallie [41]     | 1995 |                                                                        | Chlorine (9), sulphur dioxide (4), oxides of nitrogen (3), phosphine (2), ammonia (2), hydrogen sulphide, hydrogen chloride gas, sodium hydroxide, sulphuric acid, chloracetyl chloride, sodium fumes, hypochlorite, carboxylic acid, cleaning agents (3), combustion products (3), isocyanate (3), epoxy resin, glutaraldehyde, azodicarbonamide, aromatic amine, enzymes, trichloroethylene (3), methylene chloride, paint, pesticide, lubrication oil, unknown chemical |
| Stanbury [42]   | 1996 |                                                                        | Pentamidine                                                                                                                                                                                                                                                                                                                                                                                                                                                                |
| Piirila [15]    | 1996 | Sulphur dioxide (4)                                                    | Sulphur dioxide                                                                                                                                                                                                                                                                                                                                                                                                                                                            |
| Cormier [43]    | 1996 | Hydrogen sulfide                                                       |                                                                                                                                                                                                                                                                                                                                                                                                                                                                            |
| Weiss [18]      | 1996 | Sodium azide and hydrozoic acid <sup>b</sup> (2)                       |                                                                                                                                                                                                                                                                                                                                                                                                                                                                            |
| Schonhofer [19] | 1996 | Chlorine (3)                                                           |                                                                                                                                                                                                                                                                                                                                                                                                                                                                            |
| Lemiere [44]    | 1996 | Isocyanates mixed with organic solvent                                 |                                                                                                                                                                                                                                                                                                                                                                                                                                                                            |
| Yelon [45]      | 1996 |                                                                        | Formic acid                                                                                                                                                                                                                                                                                                                                                                                                                                                                |
| Lemiere [46]    | 1997 | Chlorine                                                               |                                                                                                                                                                                                                                                                                                                                                                                                                                                                            |
| Burns [47]      | 1997 | Bromine and hydrobromic acid (2)                                       |                                                                                                                                                                                                                                                                                                                                                                                                                                                                            |
| Provencher [48] | 1997 |                                                                        | Chlorine, isocyanates and acid were the most often reported causal agent                                                                                                                                                                                                                                                                                                                                                                                                   |
| Danielsen [49]  | 1998 |                                                                        | Hydrogen peroxide (3)                                                                                                                                                                                                                                                                                                                                                                                                                                                      |
| Forrester [16]  | 1997 |                                                                        | Refractory ceramic fibre, phosphoric acid <sup>b</sup>                                                                                                                                                                                                                                                                                                                                                                                                                     |
| Leroyer [50]    | 1998 | Diphenylmethane diisocyanate                                           |                                                                                                                                                                                                                                                                                                                                                                                                                                                                            |
| Conrad [51]     | 1998 | Dinitrogen tetroxide (5)                                               |                                                                                                                                                                                                                                                                                                                                                                                                                                                                            |
| Wheeler [52]    | 1998 |                                                                        | General fume (4), solvent/hydrocarbon (2), corrosive agents (3), formaldehyde (3), irritant gas (2), other (4)                                                                                                                                                                                                                                                                                                                                                             |

**Appendix 1:** (Continued)

| First author                          | Year | RADS exposures (No.) <sup>a</sup>          | Cases not meeting Brooks' criteria (No.) <sup>a</sup>                                                                                                                                                                                                                                                                                                                                                                                                                                                                                                                   |
|---------------------------------------|------|--------------------------------------------|-------------------------------------------------------------------------------------------------------------------------------------------------------------------------------------------------------------------------------------------------------------------------------------------------------------------------------------------------------------------------------------------------------------------------------------------------------------------------------------------------------------------------------------------------------------------------|
| Chatkin [6]                           | 1999 | TDI (4), isocyanate, chlorine, spray paint | Methyl mercaptan, solvent, glue <sup>b</sup> , solvent, acrylate <sup>b</sup> , TDI, isocyanate                                                                                                                                                                                                                                                                                                                                                                                                                                                                         |
| Woolf [53]                            | 1999 |                                            | Bromine                                                                                                                                                                                                                                                                                                                                                                                                                                                                                                                                                                 |
| de la Hoz [13]                        | 1999 |                                            | Bromotrifluoromethane, hydrogen fluoride, hydrogen bromide, carbonyl fluoride, carbonyl bromide <sup>b</sup>                                                                                                                                                                                                                                                                                                                                                                                                                                                            |
| Langley [54]                          | 1999 |                                            | Welding fume                                                                                                                                                                                                                                                                                                                                                                                                                                                                                                                                                            |
| Hill [55]                             | 2000 |                                            | <i>o</i> -chlorobenzylidene malononitrile (CS)                                                                                                                                                                                                                                                                                                                                                                                                                                                                                                                          |
| Meyer [56]                            | 2001 |                                            | Hydrogen fluoride, nitric acid <sup>b</sup> , aldehydes, acetic acid <sup>b</sup>                                                                                                                                                                                                                                                                                                                                                                                                                                                                                       |
| Dube [57]                             | 2002 | Thermal decomposition products of CFC(2)   | Fume from an iron smelting process                                                                                                                                                                                                                                                                                                                                                                                                                                                                                                                                      |
| Kopferschmitt-Kubler [58]             | 2002 |                                            | Acid (4), chlorine (3), isocyanate (3)                                                                                                                                                                                                                                                                                                                                                                                                                                                                                                                                  |
| Perfetti [59]                         | 2003 |                                            | Diphenylmethane diisocyanate                                                                                                                                                                                                                                                                                                                                                                                                                                                                                                                                            |
| McLaughlin [60]                       | 2003 |                                            | Chlorine (2), rubber fume, sewerage gas, ammonia, propionic acid, NH <sub>4</sub> and sorbic acid <sup>b</sup> , ethanol, isopropanol, gingerine <sup>b</sup>                                                                                                                                                                                                                                                                                                                                                                                                           |
| Piirila [22]                          | 2003 | Thermal decomposition products of CFC(2)   | Nickel, Petroleum fraction (2), smoke (3), diisocyanates (2), soldering fume, caustic acids, dry wall powder, solvents (5), glues, 2-butoxyethanol, styrene-maleic anhydride resin, isopropanol, herbicides, sulfur dioxide, Petroleum distillate, Copier toner, Saffrotin, Chemicals (NOS) (4), Ethyl acrylate, Sewer cleaner chemicals, paint fumes, diesel fuel, sodium hydroxide, chlorine, diazonin, gasoline, diesel fuel, ethylene glycol <sup>b</sup> , ammonia, acids, bases, oxidizer (NOS) <sup>b</sup> , muriatic acid, ethanolamines, indoor air pollutant |
| Henneberger [61] Some selected agents | 2003 |                                            |                                                                                                                                                                                                                                                                                                                                                                                                                                                                                                                                                                         |
| Franzblau [14]                        | 2003 |                                            | Cleaning agent (42)                                                                                                                                                                                                                                                                                                                                                                                                                                                                                                                                                     |
| Rosenman [62]                         | 2003 |                                            | World trade centre fume (20)                                                                                                                                                                                                                                                                                                                                                                                                                                                                                                                                            |
| Banauch [63]                          | 2003 | Bromochlorodifluoromethane                 | Bromochlorodifluoromethane (2)                                                                                                                                                                                                                                                                                                                                                                                                                                                                                                                                          |
| Matrat [11]                           | 2004 |                                            | Sodium hypochlorite and hydrochloric acid (chlorine) (55) <sup>b</sup>                                                                                                                                                                                                                                                                                                                                                                                                                                                                                                  |
| Gorguner [64]                         | 2004 |                                            |                                                                                                                                                                                                                                                                                                                                                                                                                                                                                                                                                                         |

<sup>a</sup>*n* = 1 except where otherwise indicated.<sup>b</sup>Indicates exposure to multiple agents.
